# Supplementary material
Source: publisher figshare collection journal article supplement (https://acs.figshare.com/ndownloader/files/25741929)
Supplement: Supplementary file 1 [file 25741929]

## **Supporting Information**

### **Ultrasensitive detection platform of disease biomarkers based on recombinase polymerase amplification with H- sandwich aptamer**

Juyoung Kang, Hyungjun Jang, Gyuho Yeom and Min-Gon Kim\*

Department of Chemistry, School of Physics and Chemistry, Gwangju Institute of Science and Technology (GIST), 123 Cheomdangwagi-ro, Buk-gu, Gwangju, 61005, Republic of Korea

\* Corresponding author.

M.-G. Kim: Tel: +82-62-715-3330, Fax: +82-62-715-3419, E-mail address: [mkim@gist.ac.kr](mailto:mkim@gist.ac.kr)

## Contents

|                                                                                                           |    |
|-----------------------------------------------------------------------------------------------------------|----|
| 1. $K_d$ values of the selected aptamer candidates (Table S1) .....                                       | S3 |
| 2. Comparison of detection sensitivity of various immunoassays (Table S2) .....                           | S4 |
| 3. Elution profile according to SELEX round (Figure S1) .....                                             | S5 |
| 4. Intercalating dye efficiency under various amplification conditions (Figure S2)<br>.....               | S6 |
| 5. Gel shift images for the detection of amplified aptamers using the H-sandwich RPA (Figure S3)<br>..... | S7 |
| 6. Detection efficiency in clinical samples according to commercialized kits (Figure S4)<br>.....         | S8 |

**Table S1.**  $K_d$  values of the selected aptamer candidates. (\* used in this study)

| Target          | Length (bp) | $K_d$ value (nM) |
|-----------------|-------------|------------------|
| p24_ap1*        | 82          | $314 \pm 101.2$  |
| p24_ap2         | 82          | $456 \pm 157.2$  |
| Ebola_ap1       | 85          | $367 \pm 119$    |
| Ebola_ap2       | 85          | $1249 \pm 529.8$ |
| Ebola_ap3*      | 85          | $23 \pm 14.2$    |
| SARS-CoV-2_ap1  | 76          | $0.39 \pm 0.08$  |
| SARS-CoV-2_ap2* | 76          | $0.57 \pm 0.13$  |
| SARS-CoV-2_ap3  | 76          | $2.32 \pm 0.48$  |
| SARS-CoV-2_ap4  | 76          | $0.8 \pm 0.13$   |
| SARS-CoV-2_ap5  | 76          | $0.66 \pm 0.16$  |

**Table S2.** Comparison of detection efficiency of various immunoassays.

| Detection method                                    | Target             | LOD                     | Multiplexed detection | Reference  |
|-----------------------------------------------------|--------------------|-------------------------|-----------------------|------------|
| PCR using short DNA aptamers                        | Thrombin           | 2 pM                    | No                    | 39         |
| Sandwich ELISA using DNA encapsulated liposomes     | Protective antigen | 4.1 ng·mL <sup>-1</sup> | Yes                   | 40         |
| Photoelectrochemical immunoassay using DNA labeling | HIV-1 p24          | 10 ng·mL <sup>-1</sup>  | No                    | 41         |
|                                                     | SARS-CoV-2 NP      | 1 fg·mL <sup>-1</sup>   |                       |            |
|                                                     | HIV-1 p24          | 10 fg·mL <sup>-1</sup>  |                       |            |
| H-sandwich RPA using DNA aptamers                   | Ebola NP           | 10 fg·mL <sup>-1</sup>  | Yes                   | This study |
|                                                     | Influenza A NP     | 1 fg·mL <sup>-1</sup>   |                       |            |
|                                                     | Influenza B NP     | 10 fg·mL <sup>-1</sup>  |                       |            |

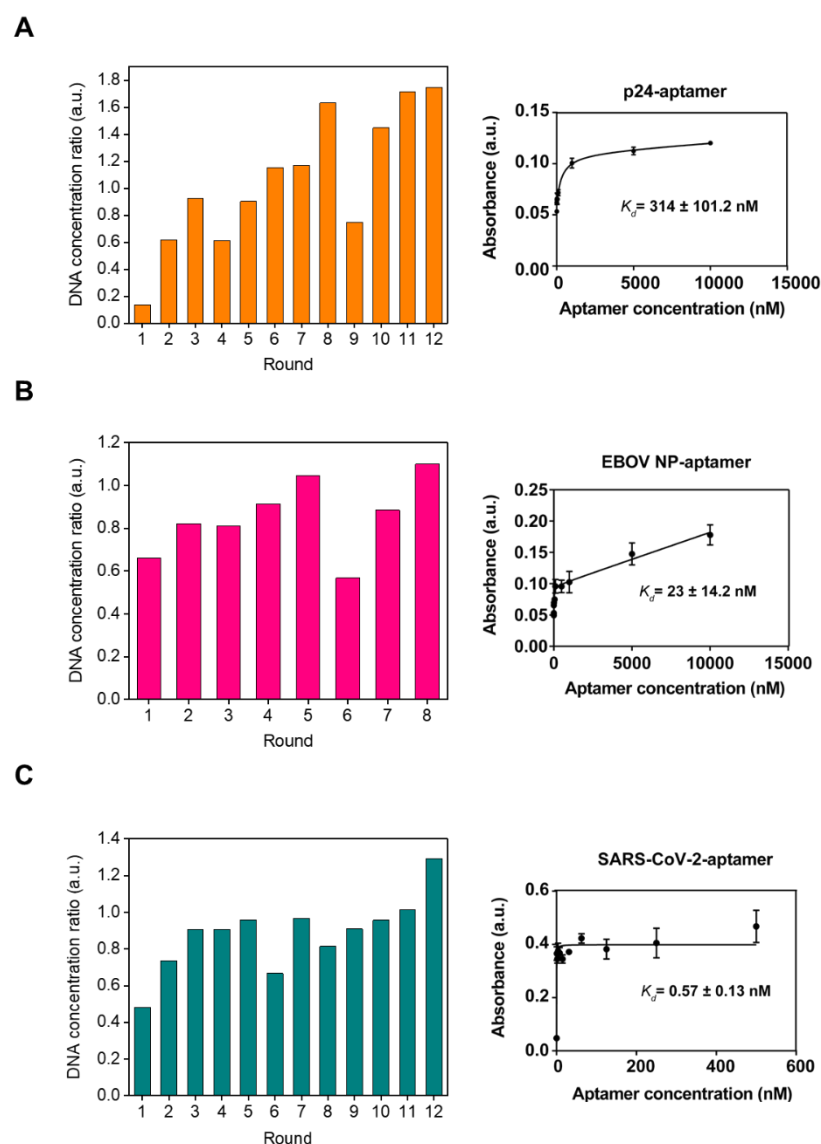

**Figure S1.** Elution profile according to SELEX round. The graphs and the  $K_d$  values (right) correspond to the aptamers used in the experiment from the aptamer candidates selected through each SELEX. (A) A total 12 round of selection was performed and  $K_d$  value of the used aptamer was  $314 \pm 101.2 \text{ nM}$  ( $R^2 = 0.97$ ). (B) A total 8 round of selection was performed and  $K_d$  value of the used aptamer was  $23 \pm 14.2 \text{ nM}$  ( $R^2 = 0.93$ ). (C) A total 12 round of selection was performed and  $K_d$  value of the used aptamer was  $0.57 \pm 0.13 \text{ nM}$  ( $R^2 = 0.87$ ). EBOV: Ebola virus

**A**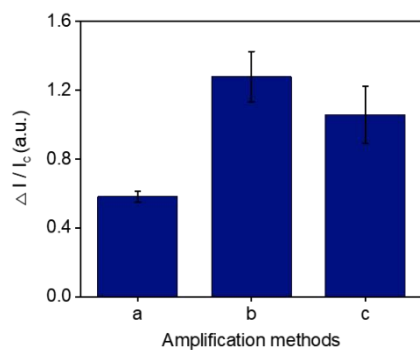**B**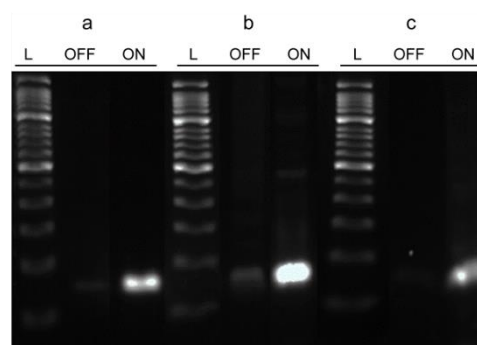

**Figure S2.** Intercalating dye efficiency under various amplification conditions. (A) Relative fluorescence intensity through amplification reactions (a: conventional PCR (30 cycles), b: RPA, c: H-sandwich RPA (NP and aptamer were used at  $0.5 \text{ pg}\cdot\text{mL}^{-1}$  and  $1 \text{ pM}$ , respectively)). Error bars show the standard deviation of three experiments. (B) Gel shift image under each of the amplification reactions (OFF: without aptamer or NP, ON: with aptamer  $1 \text{ pM}$ , NP).

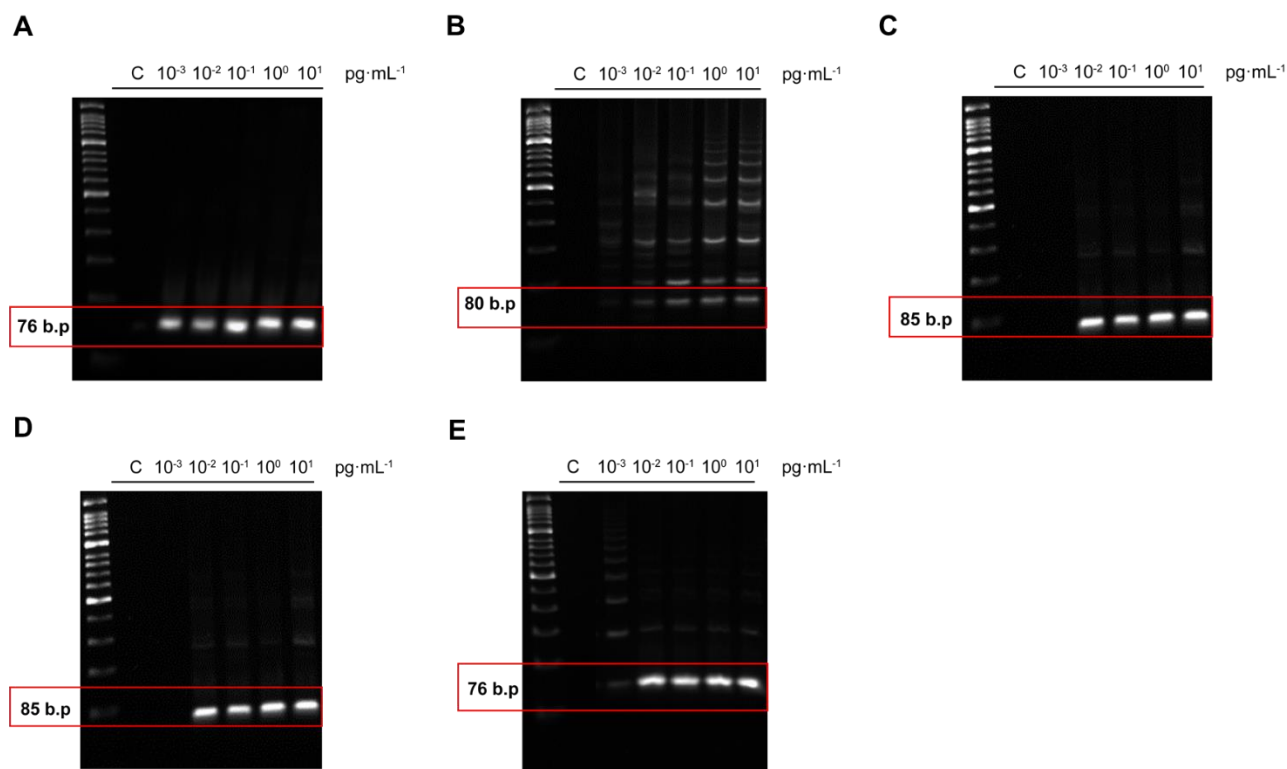

**Figure S3.** Gel shift images for the detection of amplified aptamers using the H-sandwich RPA. (A) Influenza A NP, aptamer length is 76 base pair. (B) Influenza B NP, aptamer length is 80 base pair. (C) HIV-1 p24, aptamer length is 82 base pair. (D) Ebola NP, aptamer length is 85 base pair. (E) SARS-CoV-2 NP, aptamer length is 76 base pair. Each antigen ranged in concentration from 0.001 to 10  $\text{pg}\cdot\text{mL}^{-1}$ . b.p.: base pair

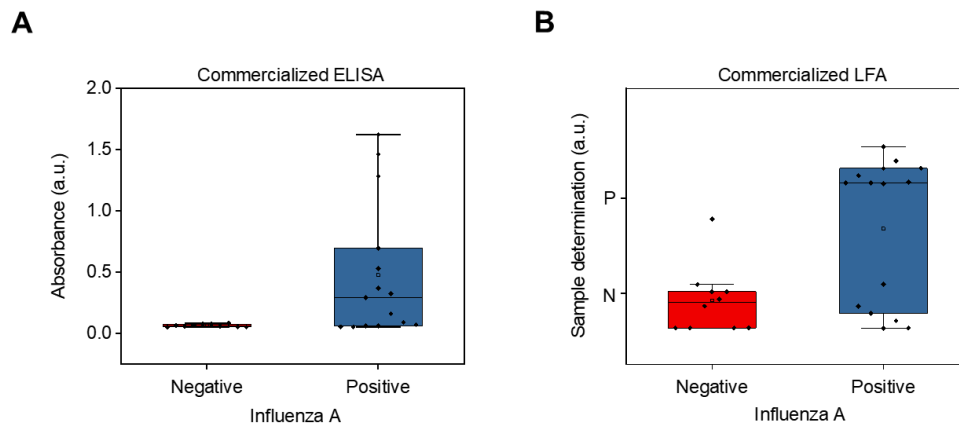

**Figure S4.** Detection efficiency in clinical samples according to commercialized kits. (A) Discrimination of negative and positive Influenza A patient samples using ELISA; negative  $n = 10$ , positive  $n = 15$ . (B) Discrimination of negative and positive Influenza A patient samples using LFA kit; negative  $n = 10$ , positive  $n = 15$ .
